# Supplementary material for: Target site as the main mechanism of resistance to imazamox in a Euphorbia heterophylla biotype
Source: PubMed Central journal article supplement (PMC6817884; doi:10.1038/s41598-019-51682-z), 2019-10-28
Supplement: 41598_2019_51682_MOESM1_ESM.pdf [file 41598_2019_51682_MOESM1_ESM.pdf]

# Target site as the main mechanism of resistance to imazamox in a *Euphorbia heterophylla* biotype

**Antonia M. Rojano-Delgado<sup>1\*</sup>, João M. Portugal<sup>2</sup>, Candelario Palma-Bautista<sup>1</sup>, Ricardo Alcántara de la Cruz<sup>3</sup>, Joel Torra<sup>4</sup>, Esteban Alcántara<sup>5</sup>, Rafael De Prado<sup>1</sup>**

<sup>1</sup>Department of Agricultural Chemistry and Edaphology, University of Córdoba, Córdoba, Spain

<sup>2</sup>Department of Biosciences, Research Center for Endogenous Resource Valorization's, Polytechnic Institute of Beja, Beja, Portugal

<sup>3</sup> Department of Chemistry, Federal University of São Carlos, São Carlos, Brazil.

<sup>4</sup>Department d'Hortofructicultura, Botànica i Jardineria, Agrotecnio, Universitat de Lleida, Lleida, Spain

<sup>5</sup>Department of Agronomy, University of Córdoba, Córdoba, Spain

\* **Corresponding author:** Antonia M. Rojano-Delgado      q92rodea@uco.es

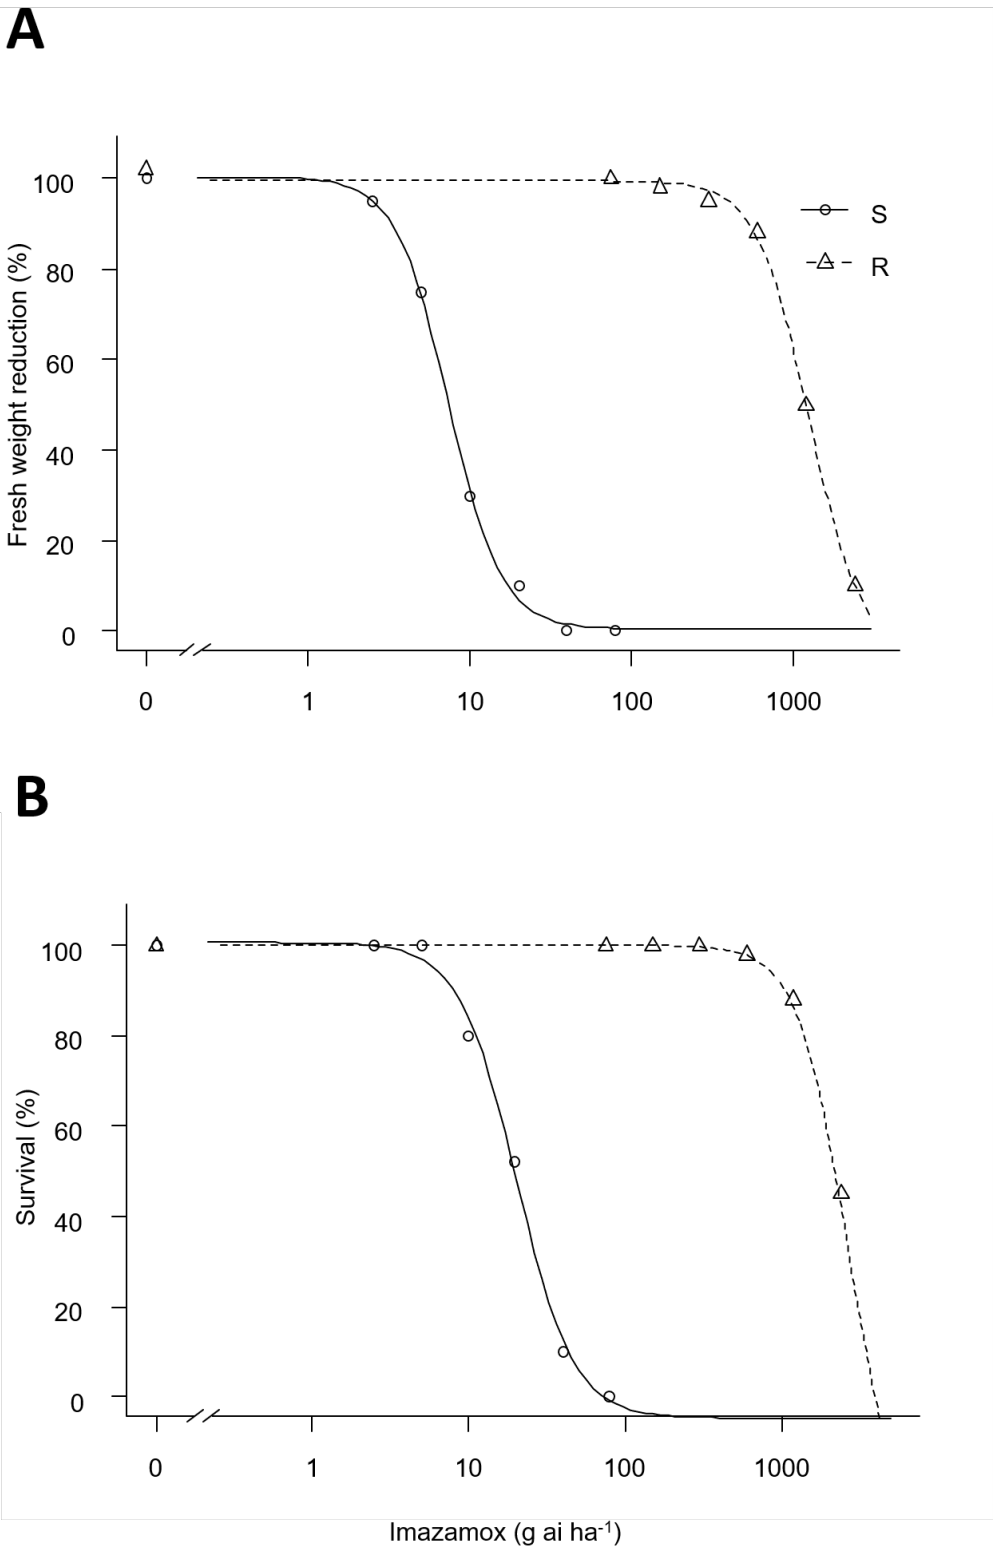

**Supplementary Fig. S1.** Log–logistic curves of imazamox-susceptible and -resistant *E. heterophylla* biotypes evaluated at 21 DAT. (A) Dose–response curves with respect to percentage of fresh weight reduction. (B) Dose–response curves with respect to percentage of survival.

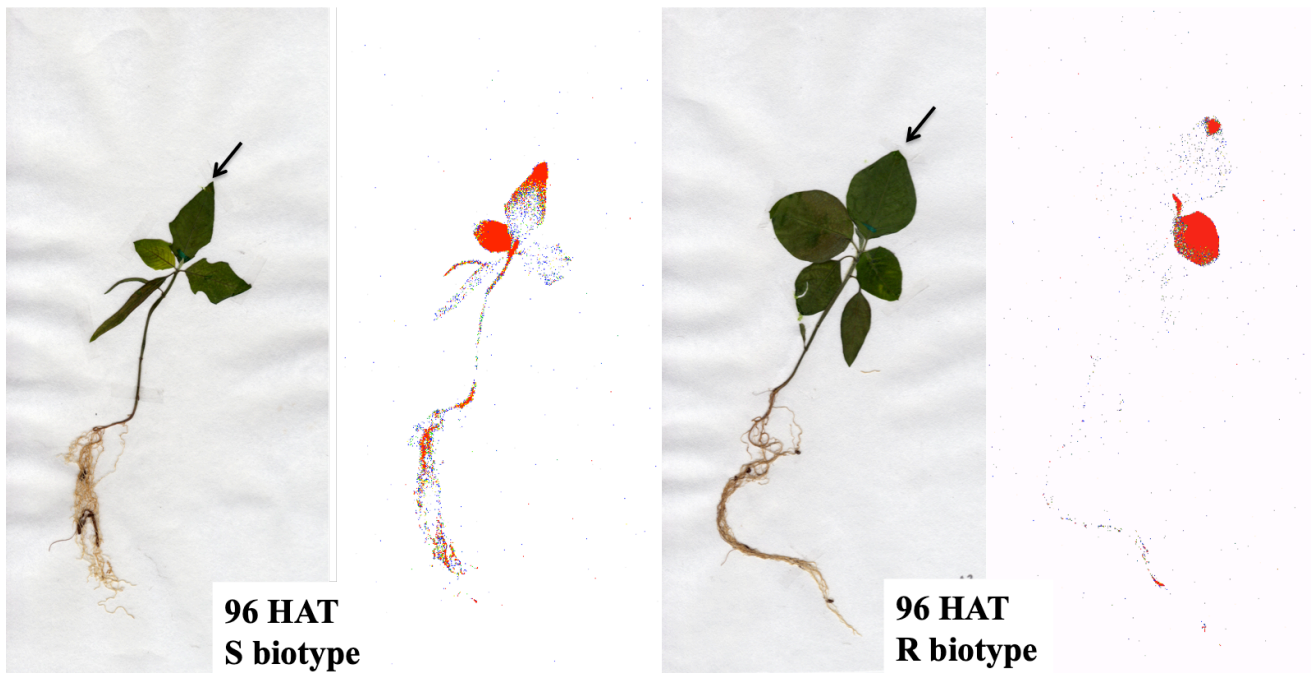

**Supplementary Fig. S2.** Representative images at 96 HAT with foliar application demonstrating the movement of  $^{14}\text{C}$ -imazamox in plants of the S (left) and R (right) biotypes of *E. heterophylla*. A greater intensity of the red color indicates a higher concentration of  $^{14}\text{C}$ -imazamox. The arrows indicate the treated leaves.

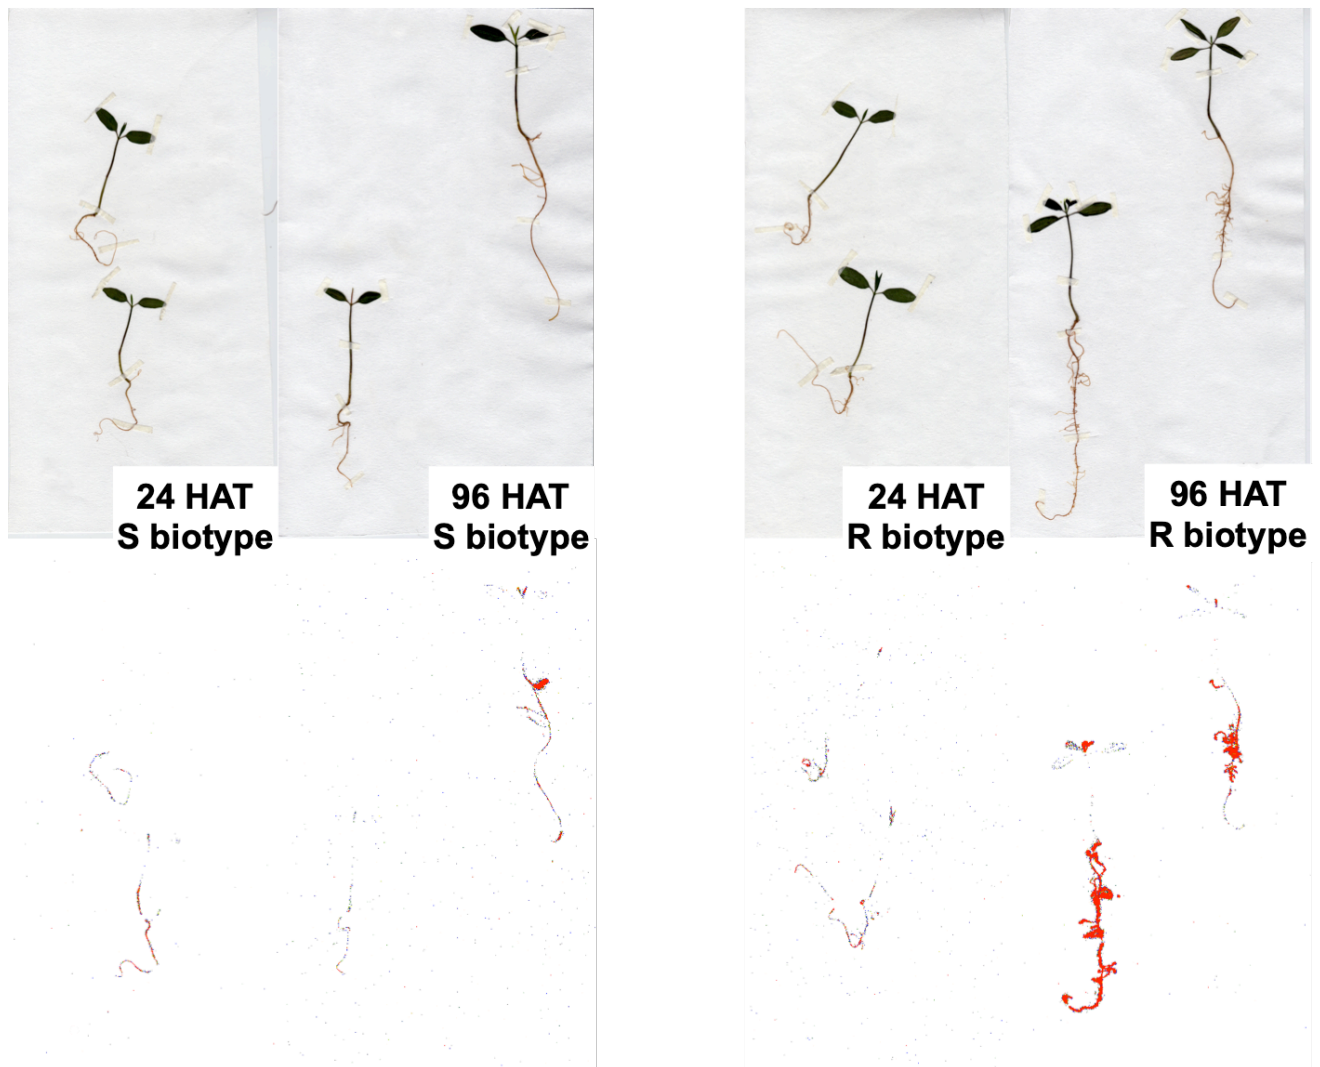

**Supplementary Fig. S3.** Representative images demonstrating the movement of  $^{14}\text{C}$ -imazamox in plants of the S (left) and R (right) biotypes of *E. heterophylla*. The images were recorded at different times in the root-application assay. A greater intensity of the red color indicates a higher concentration of  $^{14}\text{C}$ -imazamox
